# Supplementary material for: Variation in Arabidopsis flowering time associated with cis-regulatory variation in CONSTANS
Source: PubMed Central journal article supplement (PMC3997802; doi:10.1038/ncomms4651), 2014-04-16
Supplement: ncomms4651-s1.pdf [file ncomms4651-s1.pdf]

**Supplementary Table 1. *CO* genotypes of 271 accessions genotyped for the 7 bp indel.**

| Accession name | Accession number | promoter type | L311>R substitution | Accession name | Accession number | promoter type | L311>R substitution |
|----------------|------------------|---------------|---------------------|----------------|------------------|---------------|---------------------|
| Aa-0           | CS6600           | 3X            | L                   | Bu-11          | CS6641           | 4X            |                     |
| Abd-0          | CS932            | 3X            | L                   | Bu-14          | CS6646           | 3X            | L                   |
| Ag-0           | CS901            | 3X            | L                   | Bu-19          | CS6650           | 3X            | L                   |
| Ak-1           | CS6602           | 3X            | L                   | Bu-2           | CS6633           | 3X            | L                   |
| An-1           | CS6603           | 3X            | L                   | Bu-20          | CS6651           | 4X            |                     |
| An-2           | CS6604           | 3X            | L                   | Bu-24          | CS6655           | 3X            | L                   |
| Ang-0          | CS6605           | 3X            | L                   | Bu-25          | CS6656           | 3X            | L                   |
| Ang-1          | CS6606           | 3X            | L                   | Bu-3           | CS6634           | 3X            | L                   |
| Bay-0          | CS6608           | 3X            | L                   | Bu-5           | CS6636           | 3X            | L                   |
| Bch-1          | CS6609           | 3X            | L                   | Bu-6           | CS6637           | 3X            | R                   |
| Bch-3          | CS6610           | 3X            |                     | Bu-8           | CS6639           | 4X            |                     |
| Bch-4          | CS6611           | 4X            |                     | Bu-9           | CS6640           | 3X            | L                   |
| Bd-0           | CS6612           | 4X            |                     | Ca-0           | CS6658           | 4X            |                     |
| Be-1           | CS6614           | 3X            | L                   | Cal-0          | CS6659           | 3X            | L                   |
| Ber            | CS3109           | 4X            |                     | Chi-0          | CS6664           | 4X            |                     |
| Bl-1           | CS6615           | 3X            | L                   | Chi-1          | CS6665           | 4X            |                     |
| Bla-1          | CS6616           | 4X            |                     | Co             | CS3180           | 3X            |                     |
| Bla-10         | CS6622           | 4X            |                     | Co-1           | CS6669           | 3X            | L                   |
| Bla-11         | CS6623           | 4X            |                     | Co-3           | CS6671           | 3X            | L                   |
| Bla-12         | CS6624           | 4X            |                     | Co-4           | CS6672           | 3X            | L                   |
| Bla-3          | CS6618           | 4X            |                     | Col-0          | CS6673           | 4X            |                     |
| Bla-4          | CS6619           | 3X            | L                   | Ct-1           | CS6674           | 4X            |                     |
| Bla-6          | CS6621           | 4X            |                     | Da-0           | CS6676           | 4X            |                     |
| Br-0           | CS6626           | 4X            |                     | Db-0           | CS6677           | 4X            |                     |
| Bs-1           | CS6627           | 3X            | L                   | Db-1           | CS6678           | 4X            |                     |
| Bs-2           | CS6628           | 3X            | L                   | Di-0           | CS6680           | 4X            |                     |
| Bs-5           | CS6629           | 3X            | L                   | Di-1           | CS6681           | 3X            | L                   |
| Bsch-0         | CS6630           | 4X            |                     | Di-G           | CS910            | 3X            | L                   |
| Bsch-2         | CS6631           | 4X            |                     | Di-M           | CS919            | 4X            |                     |
| Bu-0           | CS6632           | 4X            |                     | Do-0           | CS6683           | 3X            | L                   |

**Supplementary Table 1. *CO* genotypes of 271 accessions genotyped for the 7bp indel (continuation).**

| Accession name | Accession number | promoter type | L311>R substitution | Accession name | Accession number | promoter type | L311>R substitution |
|----------------|------------------|---------------|---------------------|----------------|------------------|---------------|---------------------|
| Dr-0           | CS6684           | 3X            | L                   | Gu-0           | CS6730           | 3X            | L                   |
| Dra-0          | CS6685           | 4X            |                     | Gu-1           | CS6731           | 4X            |                     |
| Dra-1          | CS6686           | 4X            |                     | Gy-0           | CS6732           | 3X            | L                   |
| Edi-0          | CS6688           | 3X            | L                   | H55            | CS923            | 4X            |                     |
| Ei-2           | CS6689           | 3X            | L                   | Ha-0           | CS6733           | 4X            |                     |
| Ei-4           | CS6690           | 4X            |                     | Hi-0           | CS6736           | 4X            |                     |
| Ei-6           | CS6692           | 4X            |                     | HI-3           | CS6904           | 4X            |                     |
| Eil-0          | CS6693           | 3X            | L                   | HI-2           | CS6738           | 3X            | L                   |
| El-0           | CS6694           | 3X            | L                   | Hn-0           | CS6739           | 3X            | L                   |
| Ema-1          | CS6923           | 3X            | L                   | Hs-0           | CS6905           | 3X            | L                   |
| En-1           | CS6695           | 4X            |                     | Is-0           | CS6741           | 4X            |                     |
| En-D           | CS920            | 4X            |                     | Is-1           | CS6906           | 3X            | L                   |
| Er-0           | CS6698           | 4X            |                     | Je-0           | CS6742           | 3X            | L                   |
| Est-0          | CS6700           | 4X            |                     | Je54           | CS924            | 4X            |                     |
| Fe-1           | CS6703           | 3X            | L                   | Jl-2           | CS6744           | 3X            | L                   |
| Fi-0           | CS6704           | 4X            |                     | Jl-3           | CS6745           | 4X            |                     |
| Fi-1           | CS6705           | 3X            | L                   | Jl-5           | CS6747           | 4X            |                     |
| Fr-2           | CS6708           | 3X            | L                   | Jm-0           | CS6748           | 3X            | L                   |
| Fr-3           | CS6709           | 4X            |                     | Jm-1           | CS6749           | 4X            |                     |
| Fr-4           | CS6710           | 4X            |                     | Jm-2           | CS6750           | 4X            |                     |
| Fr-6           | CS6712           | 4X            |                     | Ka-0           | CS6752           | 3X            | L                   |
| Fr-7           | CS6713           | 4X            |                     | Kb-0           | CS6753           | 4X            |                     |
| Ga-2           | CS6715           | 3X            | L                   | Kelsterbach-1  | CS6100           | 4X            |                     |
| Gd-1           | CS6716           | 3X            | L                   | Kelsterbach-1  | CS6101           | 4X            |                     |
| Ge-1           | CS6718           | 3X            | L                   | Kelsterbach-2  | CS6102           | 3X            | L                   |
| Gie-0          | CS6720           | 3X            | L                   | Kelsterbach-3  | CS6103           | 4X            |                     |
| Go-2           | CS6722           | 4X            |                     | Kelsterbach-3  | CS6104           | 4X            |                     |
| Gr-3           | CS6725           | 4X            |                     | Kelsterbach-4  | CS6105           | 4X            |                     |
| Gr-5           | CS6727           | 3X            | L                   | Kil-0          | CS6754           | 3X            | L                   |
| Gr-6           | CS6728           | 3X            | L                   | KI-0           | CS6756           | 3X            | L                   |

**Supplementary Table 1. *CO* genotypes of 271 accessions genotyped for the 7bp indel (continuation).**

| Accession name | Accession number | promoter type | L311>R substitution | Accession name | Accession number | promoter type | L311>R substitution |
|----------------|------------------|---------------|---------------------|----------------|------------------|---------------|---------------------|
| Kl-1           | CS6757           | 3X            | L                   | Ma-0           | CS6789           | 4X            |                     |
| Kl-4           | CS6760           | 3X            | L                   | Ma-2           | CS6790           | 3X            | L                   |
| Kl-5           | CS6761           | 4X            |                     | Me-0           | CS1364           | 4X            |                     |
| Kn-0           | CS6762           | 3X            | L                   | Mh-1           | CS6793           | 3X            | L                   |
| Kr-0           | CS6764           | 4X            |                     | Mir-0          | CS6798           | 3X            | L                   |
| Kro-0          | CS6766           | 3X            | L                   | Mrk-0          | CS6796           | 3X            | L                   |
| La-0           | CS6765           | 4X            |                     | Ms-0           | CS6797           | 3X            | R                   |
| La-1           | CS6767           | 3X            | L                   | Mz-0           | CS6800           | 4X            |                     |
| Lan-0          | CS6768           | 4X            |                     | Na-1           | CS6801           | 3X            | L                   |
| Lc-0           | CS6769           | 4X            |                     | Nc-1           | CS6802           | 4X            |                     |
| Le-0           | CS6770           | 4X            |                     | Nd-0           | CS6803           | 3X            | L                   |
| Ler-1          | CS6928           | 3X            | L                   | Nie-0          | CS6804           | 3X            | L                   |
| Li-1           | CS6771           | 3X            | L                   | No-0           | CS3081           | 3X            |                     |
| Li-10          | CS6911           | 3X            | L                   | Nok-2          | CS6809           | 3X            | L                   |
| Li-2:1         | CS6772           | 4X            |                     | Nok-3          | CS6810           | 3X            | L                   |
| Li-3           | CS1316           | 4X            |                     | Nw-0           | CS6811           | 3X            | L                   |
| Li-5           | CS6775           | 4X            |                     | Nw-1           | CS6812           | 4X            |                     |
| Li-6           | CS6777           | 3X            | R                   | Nw-2           | CS6813           | 4X            |                     |
| Li-6:1         | CS1328           | 3X            | L                   | Nw-3           | CS6814           | 4X            |                     |
| Li-7           | CS6778           | 3X            | L                   | Nw-4           | CS6815           | 3X            | L                   |
| Li-8           | CS6779           | 4X            |                     | Ob-0           | CS6816           | 4X            |                     |
| Lip-0          | CS6780           | 3X            | R                   | Ob-2           | CS6818           | 4X            |                     |
| Litva          | CS925            | 4X            |                     | Old-1          | CS6820           | 3X            | L                   |
| Ll-0           | CS6781           | 3X            | L                   | Old-2          | CS6821           | 3X            | L                   |
| Ll-1           | CS6782           | 3X            | L                   | Or-0           | CS6822           | 4X            |                     |
| Ll-2           | CS6783           | 3X            | L                   | Ove-0          | CS6823           | 3X            | L                   |
| Lm-2           | CS6784           | 3X            | L                   | Oy-0           | CS6824           | 3X            | L                   |
| Lo-2           | CS6786           | 3X            | L                   | Oy-1           | CS6929           | 3X            | L                   |
| Lu-1           | CS1352           | 3X            | L                   | Pa-1           | CS6825           | 3X            | L                   |
| Lz-0           | CS6788           | 3X            | L                   | Pa-2           | CS6826           | 3X            | L                   |

**Supplementary Table 1. *CO* genotypes of 271 accessions genotyped for the 7bp indel (continuation).**

| Accession name | Accession number | promoter type | L311>R substitution | Accession name | Accession number | promoter type | L311>R substitution |
|----------------|------------------|---------------|---------------------|----------------|------------------|---------------|---------------------|
| Pa-3           | CS6827           | 4X            |                     | Pla-3          | CS6836           | 3X            | L                   |
| Petergof       | CS926            | 3X            | L                   | Pla-4          | CS6837           | 3X            | L                   |
| Pf-0           | CS6831           | 4X            |                     | Pn-0           | CS6838           | 3X            | L                   |
| PHW-11         | CS6058           | 3X            | L                   | Po-0           | CS6839           | 3X            | L                   |
| PHW-13         | CS6060           | 3X            | L                   | Po-1           | CS6840           | 4X            |                     |
| PHW-15         | CS6062           | 3X            | L                   | Pr-0           | CS6841           | 4X            |                     |
| PHW-16         | CS6065           | 3X            | L                   | Pt-0           | CS6843           | 3X            | L                   |
| PHW-2          | CS6044           | 4X            |                     | Rak-2          | CS6846           | 4X            |                     |
| PHW-21         | CS6073           | 3X            | L                   | Rd-0           | CS6845           | 4X            |                     |
| PHW-22         | CS6075           | 3X            | L                   | RLD1           | CS913            | 4X            |                     |
| PHW-22         | CS6076           | 3X            | L                   | Rld-2          | CS6927           | 4X            |                     |
| PHW-24         | CS6078           | 3X            | L                   | Rou-0          | CS6847           | 3X            | L                   |
| PHW-25         | CS6079           | 3X            | L                   | Rsch-0         | CS6848           | 4X            |                     |
| PHW-28         | CS6083           | 4X            |                     | Rsch-4         | CS6850           | 3X            | L                   |
| PHW-29         | CS6085           | 3X            | L                   | Rubezhnoe-1    | CS927            | 3X            | R                   |
| PHW-3          | CS6046           | 4X            |                     | Rubezhnoe-2    | CS928            | 3X            | R                   |
| PHW-30         | CS6087           | 3X            | L                   | S96            | CS914            | 4X            |                     |
| PHW-32         | CS6090           | 4X            |                     | Sap-0          | CS6854           | 4X            |                     |
| PHW-33         | CS6092           | 3X            | L                   | Sav-0          | CS6856           | 4X            |                     |
| PHW-33         | CS6093           | 3X            | L                   | Se-0           | CS6852           | 4X            |                     |
| PHW-34         | CS6095           | 3X            | L                   | Sei-0          | CS6853           | 3X            | L                   |
| PHW-35         | CS6097           | 3X            | L                   | Sf-1           | CS6855           | 3X            | L                   |
| PHW-36         | CS6098           | 3X            | L                   | Sf-2           | CS6857           | 4X            |                     |
| PHW-37         | CS6099           | 3X            | L                   | Sg-1           | CS6858           | 3X            | L                   |
| PHW-4          | CS6047           | 3X            | L                   | Sg-2           | CS6859           | 3X            | L                   |
| PHW-5          | CS6048           | 3X            | L                   | Sh-0           | CS6860           | 4X            |                     |
| Pi-0           | CS6832           | 3X            | L                   | Si-0           | CS6861           | 3X            | L                   |
| Pi-2           | CS6833           | 4X            |                     | Sn(5)-1        | CS6181           | 4X            |                     |
| Pla-0          | CS6834           | 3X            | L                   | Sp-0           | CS6862           | 3X            | L                   |
| Pla-1          | CS6835           | 3X            | L                   | St-0           | CS6863           | 3X            | L                   |

**Supplementary Table 1. *CO* genotypes of 271 accessions genotyped for the 7bp indel (continuation).**

| <b>Accession name</b> | <b>Accession number</b> | <b>promoter type</b> | <b>L311&gt;R substitution</b> |
|-----------------------|-------------------------|----------------------|-------------------------------|
| Ste-0                 | CS6864                  | 4X                   |                               |
| Stw-0                 | CS6865                  | 3X                   | R                             |
| Su-0                  | CS1540                  | 3X                   | L                             |
| Ta-0                  | CS6867                  | 4X                   |                               |
| Te-0                  | CS6918                  | 3X                   | L                             |
| Ts-6                  | CS6872                  | 3X                   | L                             |
| Ts-7                  | CS6873                  | 3X                   | L                             |
| Tu-0                  | CS6875                  | 3X                   | L                             |
| Tu-1                  | CS6876                  | 3X                   | L                             |
| Uk-1                  | CS6879                  | 3X                   | L                             |
| Uk-2                  | CS6881                  | 4X                   |                               |
| Uk-3                  | CS6880                  | 4X                   |                               |
| Uk-4                  | CS6882                  | 4X                   |                               |
| Vi-0                  | CS6883                  | 4X                   |                               |
| Wa-1                  | CS6885                  | 4X                   |                               |
| Wc-1                  | CS6886                  | 3X                   | L                             |
| Wc-2                  | CS6887                  | 4X                   |                               |
| Wei-0                 | CS6182                  | 3X                   | L                             |
| Wei-1                 | CS6925                  | 3X                   | L                             |
| WI-0                  | CS6920                  | 3X                   | L                             |
| Wil-1                 | CS6888                  | 3X                   | L                             |
| Wil-2                 | CS6889                  | 4X                   |                               |
| Ws                    | CS915                   | 4X                   |                               |
| Ws-0                  | CS1602                  | 4X                   |                               |
| Wt-1                  | CS6892                  | 3X                   | R                             |
| Wt-2                  | CS6893                  | 3X                   | R                             |
| Wt-4                  | CS6895                  | 3X                   | L                             |
| Wt-5                  | CS6896                  | 4X                   |                               |
| Wu-0                  | CS6897                  | 3X                   | L                             |
| Zu-0                  | CS6902                  | 3X                   | L                             |
| Zu-1                  | CS6903                  | 3X                   | L                             |

Supplementary Table 2. ANOVA Summary Tables

| <b>Bolting in unvernalized plants</b> |           |               |           |           |           |
|---------------------------------------|-----------|---------------|-----------|-----------|-----------|
| Source                                | Nparm     | DF            | DFDen     | F Ratio   | Prob>F    |
| <i>CO</i> type                        | 1         | 1             | 654.5     | 96.99     | <0.0001   |
| <i>FRI</i> allele                     | 1         | 1             | 651.7     | 411.23    | <0.0001   |
| <i>CO</i> * <i>FRI</i>                | 1         | 1             | 650.2     | 32.15     | <0.0001   |
| Family[ <i>CO</i> , <i>FRI</i> ]      | 11        | 11            | 649.8     | 45.50     | <0.0001   |
| Random effect                         | Var Ratio | Var Component | Std error | 95% Lower | 95% Upper |
| Block                                 | -0.02255  | 4.62          | 3.50      | -2.24     | 11.49     |
| Residual                              |           | 204.97        | 11.40     | 184.33    | 229.30    |
| Total                                 |           | 209.59        |           |           |           |

| <b>Number of leaves in unvernalized plants</b> |           |               |           |           |           |
|------------------------------------------------|-----------|---------------|-----------|-----------|-----------|
| Source                                         | Nparm     | DF            | DFDen     | F Ratio   | Prob>F    |
| <i>CO</i> type                                 | 1         | 1             | 743       | 194.45    | <0.0001   |
| <i>FRI</i> allele                              | 1         | 1             | 741.3     | 443.66    | <0.0001   |
| <i>CO</i> * <i>FRI</i>                         | 1         | 1             | 739.5     | 20.81     | <0.0001   |
| Family[ <i>CO</i> , <i>FRI</i> ]               | 11        | 11            | 739.6     | 60.94     | <0.0001   |
| Random effect                                  | Var Ratio | Var Component | Std error | 95% Lower | 95% Upper |
| Block                                          | 0.0265    | 1.83          | 1.19      | -0.50     | 4.16      |
| Residual                                       |           | 69.11         | 3.59      | 62.57     | 76.75     |
| Total                                          |           | 70.95         |           |           |           |

| <b>Bolting in vernalized plants</b> |           |               |           |           |           |
|-------------------------------------|-----------|---------------|-----------|-----------|-----------|
| Source                              | Nparm     | DF            | DFDen     | F Ratio   | Prob>F    |
| <i>CO</i> type                      | 1         | 1             | 629.4     | 52.85     | <0.0001   |
| <i>FRI</i> allele                   | 1         | 1             | 626.5     | 207.02    | <0.0001   |
| <i>CO</i> * <i>FRI</i>              | 1         | 1             | 629.4     | 26.13     | <0.0001   |
| Family[ <i>CO</i> , <i>FRI</i> ]    | 11        | 11            | 627.6     | 24.99     | <0.0001   |
| Random effect                       | Var Ratio | Var Component | Std error | 95% Lower | 95% Upper |
| Block                               | 0.0339    | 1.41          | 0.88      | -0.32     | 3.15      |
| Residual                            |           | 41.63         | 2.35      | 37.37     | 46.67     |
| Total                               |           | 43.05         |           |           |           |

**Supplementary Table 2. ANOVA Summary Tables (continuation)**

| <b>Number of leaves in vernalized plants</b> |                  |                      |                  |                  |                  |
|----------------------------------------------|------------------|----------------------|------------------|------------------|------------------|
| <b>Source</b>                                | <b>Nparm</b>     | <b>DF</b>            | <b>DFDen</b>     | <b>F Ratio</b>   | <b>Prob&gt;F</b> |
| <i>CO</i> type                               | 1                | 1                    | 628.1            | 199.53           | <0.0001          |
| <i>FRI</i> allele                            | 1                | 1                    | 625.7            | 242.14           | <0.0001          |
| <i>CO*FRI</i>                                | 1                | 1                    | 627.9            | 42.73            | <0.0001          |
| <b>Family[CO,FRI]</b>                        | 11               | 11                   | 626.7            | 40.12            | <0.0001          |
|                                              |                  |                      |                  |                  |                  |
| <b>Random effect</b>                         | <b>Var Ratio</b> | <b>Var Component</b> | <b>Std error</b> | <b>95% Lower</b> | <b>95% Upper</b> |
| <b>Block</b>                                 | 0.04936          | 1.52                 | 0.79             | -0.03            | 3.08             |
| <b>Residual</b>                              |                  | 30.88                | 1.74             | 27.72            | 34.62            |
| <b>Total</b>                                 |                  | 32.41                |                  |                  |                  |

**Supplementary Table 3. Mean flowering times.**

|                     | <b>Bolting time.</b> Letters indicate significant differences (Tukey-test) between groups ( $p < 0.05$ ). |                           |                       |                               |
|---------------------|-----------------------------------------------------------------------------------------------------------|---------------------------|-----------------------|-------------------------------|
|                     | <b>Genotype</b>                                                                                           | <b>Least Square means</b> | <b>Standard Error</b> | <b>Number of observations</b> |
| <b>vernalized</b>   | <i>CO 3X</i>                                                                                              | 59.66                     | 0.46                  | 298                           |
|                     | <i>CO 4X</i>                                                                                              | 63.43                     | 0.44                  | 360                           |
|                     | <i>fri-</i>                                                                                               | 57.82                     | 0.47                  | 263                           |
|                     | <i>FRI-Sf2</i>                                                                                            | 65.26                     | 0.42                  | 395                           |
|                     | <i>CO 3X, fri-</i>                                                                                        | 57.27 <sup>c</sup>        | 0.63                  | 126                           |
|                     | <i>CO 4X, fri-</i>                                                                                        | 58.38 <sup>c</sup>        | 0.61                  | 137                           |
|                     | <i>CO 3X, FRI-Sf2</i>                                                                                     | 62.06 <sup>b</sup>        | 0.56                  | 172                           |
|                     | <i>CO 4X, FRI-Sf2</i>                                                                                     | 69.47 <sup>a</sup>        | 0.50                  | 223                           |
| <b>unvernalized</b> | <i>CO 3X</i>                                                                                              | 48.46                     | 0.93                  | 358                           |
|                     | <i>CO 4X</i>                                                                                              | 59.65                     | 0.93                  | 414                           |
|                     | <i>fri-</i>                                                                                               | 42.55                     | 0.95                  | 306                           |
|                     | <i>FRI-Sf2</i>                                                                                            | 65.56                     | 0.91                  | 466                           |
|                     | <i>CO 3X, fri-</i>                                                                                        | 40.17 <sup>d</sup>        | 1.25                  | 152                           |
|                     | <i>CO 4X, fri-</i>                                                                                        | 44.93 <sup>c</sup>        | 1.25                  | 154                           |
|                     | <i>CO 3X, FRI-Sf2</i>                                                                                     | 56.75 <sup>b</sup>        | 1.19                  | 206                           |
|                     | <i>CO 4X, FRI-Sf2</i>                                                                                     | 74.37 <sup>a</sup>        | 1.21                  | 260                           |

**Supplementary Table 4. Mean flowering times including 2X allele.**

|                     | <b>Bolting time.</b> Letters within each highlighted box indicate significant differences (Tukey-test) between groups ( $p < 0.05$ ). |                           |                       |                               |
|---------------------|---------------------------------------------------------------------------------------------------------------------------------------|---------------------------|-----------------------|-------------------------------|
|                     | <b>Genotype</b>                                                                                                                       | <b>Least Square means</b> | <b>Standard Error</b> | <b>Number of observations</b> |
| <b>vernalized</b>   | <i>CO 2X</i>                                                                                                                          | 61.94 <sup>b</sup>        | 0.49                  | 219                           |
|                     | <i>CO 3X</i>                                                                                                                          | 59.66 <sup>c</sup>        | 0.44                  | 298                           |
|                     | <i>CO 4X</i>                                                                                                                          | 63.42 <sup>a</sup>        | 0.42                  | 360                           |
|                     | <i>fri-</i>                                                                                                                           | 57.82                     | 0.42                  | 263                           |
|                     | <i>FRI-Sf2</i>                                                                                                                        | 65.52                     | 0.38                  | 395                           |
|                     | <i>CO 2X, fri-</i>                                                                                                                    | 57.82 <sup>a</sup>        | 0.69                  | 90                            |
|                     | <i>CO 3X, fri-</i>                                                                                                                    | 57.27 <sup>a</sup>        | 0.60                  | 126                           |
|                     | <i>CO 4X, fri-</i>                                                                                                                    | 58.37 <sup>a</sup>        | 0.58                  | 137                           |
|                     | <i>CO 2X, FRI-Sf2</i>                                                                                                                 | 66.05 <sup>c</sup>        | 0.59                  | 129                           |
|                     | <i>CO 3X, FRI-Sf2</i>                                                                                                                 | 62.04 <sup>d</sup>        | 0.53                  | 172                           |
|                     | <i>CO 4X, FRI-Sf2</i>                                                                                                                 | 68.47 <sup>b</sup>        | 0.48                  | 223                           |
| <b>unvernalized</b> | <i>CO 2X</i>                                                                                                                          | 55.78 <sup>b</sup>        | 1.06                  | 254                           |
|                     | <i>CO 3X</i>                                                                                                                          | 48.45 <sup>c</sup>        | 0.94                  | 358                           |
|                     | <i>CO 4X</i>                                                                                                                          | 59.67 <sup>a</sup>        | 0.94                  | 414                           |
|                     | <i>fri-</i>                                                                                                                           | 41.60                     | 0.87                  | 306                           |
|                     | <i>FRI-Sf2</i>                                                                                                                        | 67.67                     | 0.82                  | 466                           |
|                     | <i>CO 2X, fri-</i>                                                                                                                    | 39.77 <sup>cd</sup>       | 1.50                  | 102                           |
|                     | <i>CO 3X, fri-</i>                                                                                                                    | 40.15 <sup>d</sup>        | 1.26                  | 152                           |
|                     | <i>CO 4X, fri-</i>                                                                                                                    | 44.89 <sup>c</sup>        | 1.25                  | 154                           |
|                     | <i>CO 2X, FRI-Sf2</i>                                                                                                                 | 71.79 <sup>a</sup>        | 1.32                  | 152                           |
|                     | <i>CO 3X, FRI-Sf2</i>                                                                                                                 | 56.76 <sup>b</sup>        | 1.20                  | 206                           |
|                     | <i>CO 4X, FRI-Sf2</i>                                                                                                                 | 74.46 <sup>a</sup>        | 1.22                  | 260                           |

**Supplementary Table 5. Mean primary leaf numbers including 2X allele.**

|                     | <b>Number of leaves.</b> Letters within each highlighted box indicate significant differences (Tukey-test) between groups ( $p < 0.05$ ). |                           |                       |                               |
|---------------------|-------------------------------------------------------------------------------------------------------------------------------------------|---------------------------|-----------------------|-------------------------------|
|                     | <b>Genotype</b>                                                                                                                           | <b>Least Square means</b> | <b>Standard Error</b> | <b>Number of observations</b> |
| <b>vernalized</b>   | <i>CO 2X</i>                                                                                                                              | 30.32 <sup>b</sup>        | 0.41                  | 219                           |
|                     | <i>CO 3X</i>                                                                                                                              | 30.78 <sup>c</sup>        | 0.43                  | 298                           |
|                     | <i>CO 4X</i>                                                                                                                              | 37.07 <sup>a</sup>        | 0.41                  | 360                           |
|                     | <i>fri-</i>                                                                                                                               | 30.32                     | 0.41                  | 263                           |
|                     | <i>FRI-Sf2</i>                                                                                                                            | 38.39                     | 0.38                  | 395                           |
|                     | <i>CO 2X, fri-</i>                                                                                                                        | 30.02 <sup>c</sup>        | 0.64                  | 90                            |
|                     | <i>CO 3X, fri-</i>                                                                                                                        | 28.78 <sup>c</sup>        | 0.56                  | 126                           |
|                     | <i>CO 4X, fri-</i>                                                                                                                        | 32.15 <sup>b</sup>        | 0.54                  | 137                           |
|                     | <i>CO 2X, FRI-Sf2</i>                                                                                                                     | 40.38 <sup>a</sup>        | 0.56                  | 129                           |
|                     | <i>CO 3X, FRI-Sf2</i>                                                                                                                     | 32.78 <sup>b</sup>        | 0.50                  | 172                           |
|                     | <i>CO 4X, FRI-Sf2</i>                                                                                                                     | 42.00 <sup>a</sup>        | 0.46                  | 223                           |
| <b>unvernalized</b> | <i>CO 2X</i>                                                                                                                              | 41.20 <sup>b</sup>        | 0.62                  | 254                           |
|                     | <i>CO 3X</i>                                                                                                                              | 36.01 <sup>c</sup>        | 0.55                  | 358                           |
|                     | <i>CO 4X</i>                                                                                                                              | 44.58 <sup>a</sup>        | 0.54                  | 414                           |
|                     | <i>fri-</i>                                                                                                                               | 32.67                     | 0.54                  | 306                           |
|                     | <i>FRI-Sf2</i>                                                                                                                            | 48.52                     | 0.48                  | 466                           |
|                     | <i>CO 2X, fri-</i>                                                                                                                        | 30.38 <sup>d</sup>        | 0.87                  | 102                           |
|                     | <i>CO 3X, fri-</i>                                                                                                                        | 30.94 <sup>d</sup>        | 0.74                  | 152                           |
|                     | <i>CO 4X, fri-</i>                                                                                                                        | 36.69 <sup>c</sup>        | 0.74                  | 154                           |
|                     | <i>CO 2X, FRI-Sf2</i>                                                                                                                     | 52.02 <sup>a</sup>        | 0.74                  | 152                           |
|                     | <i>CO 3X, FRI-Sf2</i>                                                                                                                     | 41.08 <sup>b</sup>        | 0.66                  | 206                           |
|                     | <i>CO 4X, FRI-Sf2</i>                                                                                                                     | 52.47 <sup>a</sup>        | 0.61                  | 260                           |

**Supplementary Table 6. Mean primary leaf numbers**

|                     | <b>Number of leaves.</b> Letters indicate significant differences (Tukey-test) between groups ( $p < 0.05$ ). |                           |                       |                               |
|---------------------|---------------------------------------------------------------------------------------------------------------|---------------------------|-----------------------|-------------------------------|
|                     | <b>Genotype</b>                                                                                               | <b>Least Square means</b> | <b>Standard Error</b> | <b>Number of observations</b> |
| <b>vernalized</b>   | <i>CO 3X</i>                                                                                                  | 30.77                     | 0.42                  | 298                           |
|                     | <i>CO 4X</i>                                                                                                  | 37.07                     | 0.41                  | 360                           |
|                     | <i>fri-</i>                                                                                                   | 30.45                     | 0.44                  | 263                           |
|                     | <i>FRI-Sf2</i>                                                                                                | 37.38                     | 0.39                  | 395                           |
|                     | <i>CO 3X, fri-</i>                                                                                            | 28.76 <sup>c</sup>        | 0.56                  | 126                           |
|                     | <i>CO 4X, fri-</i>                                                                                            | 32.15 <sup>b</sup>        | 0.55                  | 137                           |
|                     | <i>CO 3X, FRI-Sf2</i>                                                                                         | 32.77 <sup>b</sup>        | 0.50                  | 172                           |
|                     | <i>CO 4X, FRI-Sf2</i>                                                                                         | 41.99 <sup>a</sup>        | 0.46                  | 223                           |
| <b>unvernalized</b> | <i>CO 3X</i>                                                                                                  | 36.00                     | 0.53                  | 358                           |
|                     | <i>CO 4X</i>                                                                                                  | 44.58                     | 0.52                  | 414                           |
|                     | <i>fri-</i>                                                                                                   | 33.82                     | 0.56                  | 306                           |
|                     | <i>FRI-Sf2</i>                                                                                                | 46.77                     | 0.49                  | 466                           |
|                     | <i>CO 3X, fri-</i>                                                                                            | 30.93 <sup>d</sup>        | 0.74                  | 152                           |
|                     | <i>CO 4X, fri-</i>                                                                                            | 36.71 <sup>c</sup>        | 0.73                  | 154                           |
|                     | <i>CO 3X, FRI-Sf2</i>                                                                                         | 41.08 <sup>b</sup>        | 0.65                  | 206                           |
|                     | <i>CO 4X, FRI-Sf2</i>                                                                                         | 52.46 <sup>a</sup>        | 0.59                  | 260                           |

**Supplementary Table 7. *CONSTANS* expression profiles of *Arabidopsis* accessions.**

| <b>Accession</b> | <b>CS number</b> | <b><i>CO</i><br/>type</b> | <b><i>FRI</i><br/>type</b> | <b><i>CO</i> expression<br/>(<i>Actin</i> normalized)</b> |
|------------------|------------------|---------------------------|----------------------------|-----------------------------------------------------------|
| Bor-4            | CS22591          | 4x                        | fri-                       | 5.28                                                      |
| C24              | CS22620          | 3x                        | FRI+                       | 2.20                                                      |
| Col-0            | CS22620          | 4x                        | fri-                       | 6.57                                                      |
| Edi-0            | CS22657          | 3x                        | FRI+                       | 9.87                                                      |
| Knox-18          | CS22567          | 3x                        | FRI+                       | 1.00                                                      |
| Lp2-2            | CS22594          | 4x                        | FRI+                       | 6.11                                                      |
| Lp2-6            | CS22595          | 3x                        | FRI+                       | 2.63                                                      |
| Lz-0             | CS22615          | 3x                        | fri-                       | 2.89                                                      |
| Mrk-0            | CS22635          | 3x                        | fri-                       | 1.24                                                      |
| Ms-0             | CS22655          | 3x                        | FRI+                       | 2.34                                                      |
| Mt-0             | CS22642          | 4x                        | fri-                       | 8.79                                                      |
| Oy-0             | CS22658          | 3x                        | fri-                       | 7.51                                                      |
| Ra-0             | CS22632          | 3x                        | fri-                       | 11.25                                                     |
| Sf-2             | CS6857           | 4x                        | FRI+                       | 14.73                                                     |
| Tsu-1            | CS22647          | 3x                        | fri-                       | 1.89                                                      |
| Van-0            | CS22627          | 3x                        | FRI+                       | 2.97                                                      |

**Supplementary Table S8. Two-way ANOVA Summary Table for *CONSTANS* expression in *Arabidopsis* accessions as response of CO and FRI allele types**

| Source            | Nparm | DF | Sum of Squares | F Ratio | Prob>F        |
|-------------------|-------|----|----------------|---------|---------------|
| <b>Model</b>      |       | 3  | 79.53          | 1.89    | 0.1845        |
| <i>CO</i> type    | 1     | 1  | 65.15          | 4.65    | <b>0.0519</b> |
| <i>FRI</i> allele | 1     | 1  | 3.62           | 0.25    | 0.6201        |
| <b>CO*FRI</b>     | 1     | 1  | 20.78          | 1.48    | 0.2464        |
| <b>Error</b>      |       | 12 | 167.97         |         |               |
| <b>Total</b>      |       | 15 | 247.50         |         |               |

**Supplementary Table 9. ANCOVA Summary Table for *CONSTANS* expression in *Arabidopsis* accessions as response of *CO* allele type and *FLC* expression**

| Source                | Nparm | DF | Sum of Squares | F Ratio | Prob>F |
|-----------------------|-------|----|----------------|---------|--------|
| <b>Model</b>          |       | 3  | 110.32         | 3.21    | 0.0615 |
| <i>CO</i> type        | 1     | 1  | 32.55          | 2.84    | 0.1173 |
| <i>FLC</i> expression | 1     | 1  | 4.68           | 0.41    | 0.5340 |
| <i>CO*FLC</i>         | 1     | 1  | 4.26           | 0.37    | 0.5526 |
| <b>Error</b>          |       | 12 | 137.18         |         |        |
| <b>Total</b>          |       | 15 | 247.50         |         |        |
